# Supplementary material for: Diversity, Taxonomic Novelty, and Encoded Functions of Salar de Ascotán Microbiota, as Revealed by Metagenome-Assembled Genomes
Source: Microorganisms. 2023 Nov 20;11(11):2819. doi: 10.3390/microorganisms11112819 (PMC10673233; doi:10.3390/microorganisms11112819)
Supplement: Supplementary file 1 [file microorganisms-11-02819-s001.zip › Table S1.xlsx]

## Sheet: Supplementary Table 1
Table S1. ASV count of the bacterial genera identified in the Salar de Ascotán samples.
Genus	ASV count sediment	ASV count soil	ASV count water
Rhodoferax	216	0	8396
Pseudomonas	21	0	8195
Acinetobacter	0	0	2315
Rheinheimera	24	0	1410
Pseudorhodobacter	80	0	876
Flavobacterium	312	0	662
Shewanella	0	0	545
Gemmobacter	19	0	502
Hydrogenophaga	479	0	451
Luteolibacter	439	67	368
Arcobacter	33	16	334
Aeromonas	0	0	327
Arcicella	0	0	291
Cetobacterium	0	0	231
Alkalimonas	0	0	218
Emticicia	0	0	212
Azorhizophilus	0	0	202
Paucibacter	0	0	199
Octadecabacter	0	0	189
Acidovorax	0	0	178
Cellvibrio	0	0	168
Ahrensia	0	17	156
Paenirhodobacter	0	0	155
Tabrizicola	382	56	137
Deefgea	0	0	129
Lacihabitans	13	0	128
Sphaerotilus	0	0	121
Paludibacter	72	0	117
Subsaxibacter	0	0	110
Allorhizobium-Neorhizobium-Pararhizobium-Rhizobium	0	0	97
Dechloromonas	42	0	95
Arcticiflavibacter	0	0	87
Loktanella	0	76	85
Candidatus_Symbiobacter	0	0	79
Neorhizobium	0	0	78
Parablastomonas	0	0	74
Flectobacillus	0	0	72
Rubrivivax	0	0	72
Sphingorhabdus	59	0	71
Rhizobacter	0	0	66
Crenobacter	0	0	64
Roseinatronobacter	0	0	61
Porphyrobacter	124	60	57
Haloferula	0	134	53
Algoriphagus	24	0	51
Chryseobacterium	0	0	51
Hoeflea	0	0	48
Pleurocapsa_PCC-7319	37	0	46
Rubidimonas	0	0	45
Ketogulonicigenium	0	0	42
Calothrix_KVSF5	119	0	40
Ideonella	0	0	39
Tychonema_CCAP_1459-11B	0	0	36
SH-PL14	0	0	35
Methylotenera	0	0	34
Roseibacillus	0	0	33
Citreitalea	0	0	30
Pygmaiobacter	0	0	30
IMCC26134	0	0	29
Mucinivorans	0	0	29
Arenimonas	53	0	27
Pirellula	53	6	26
Marinomonas	0	0	26
OLB12	461	0	25
Hyphomicrobium	114	0	24
Vibrio	0	0	23
Hyphomonas	175	0	22
Acaryochloris_MBIC11017	0	0	21
Leptolyngbya_ANT.L52.2	0	0	21
Actibacter	176	0	20
Ferruginibacter	48	0	20
Steroidobacter	0	0	20
Geminocystis_PCC-6308	105	0	19
Rikenella	0	0	19
Sulfurifustis	94	0	16
Phaeodactylibacter	59	0	15
Thiothrix	43	0	12
Crocinitomix	20	0	11
Sulfuricurvum	76	0	8
Rhodopirellula	11	44	7
Roseimarinus	134	58	6
OM27_clade	32	0	6
Sulfurimonas	91	29	5
Chryseolinea	172	0	4
IheB3-7	49	0	4
Rubribacterium	23	0	4
Amphiplicatus	203	0	2
Haliangium	18	0	2
Halanaerobium	0	2670	0
Aliifodinibius	0	2669	0
Truepera	27	852	0
Thiohalophilus	0	786	0
Halofilum	0	761	0
Halothiobacillus	0	734	0
Marinobacter	0	732	0
Thioalkalivibrio	0	660	0
Roseovarius	79	650	0
Psychroflexus	0	643	0
Halomonas	0	641	0
Gracilimonas	0	560	0
Spirochaeta_2	177	504	0
Wenzhouxiangella	0	498	0
Tangfeifania	0	456	0
Desulfovermiculus	0	440	0
Rhodohalobacter	0	396	0
ADurb.Bin120	0	388	0
Desulfosalsimonas	0	305	0
Desulfotignum	0	277	0
Fodinibius	0	269	0
Desulfonatronobacter	0	261	0
Bradymonas	0	255	0
Sediminispirochaeta	76	238	0
Pseudohongiella	9	232	0
Marinilabilia	0	229	0
Desulfatiglans	53	220	0
Alkalibacterium	0	216	0
Halospina	0	201	0
Sva0996_marine_group	56	169	0
Rhodovibrio	0	166	0
Nitrolancea	0	161	0
Desulfurivibrio	27	151	0
Brumimicrobium	0	149	0
Alkalispirochaeta	3	147	0
CI75cm.2.12	0	147	0
Melioribacter	0	139	0
Woeseia	54	125	0
Methylohalomonas	0	125	0
Marivirga	0	105	0
Owenweeksia	0	101	0
Mesorhizobium	47	89	0
Demequina	0	88	0
Desulfopila	116	85	0
Nitriliruptor	0	83	0
Egicoccus	0	82	0
Dethiosulfatibacter	0	81	0
Arhodomonas	0	79	0
Idiomarina	0	77	0
Salinibacter	0	71	0
Lentimonas	0	68	0
C1-B045	4	67	0
Marinimicrobium	0	67	0
Rhodobaculum	0	67	0
Salinivirga	0	61	0
Haliea	0	60	0
Thioalkalispira	0	60	0
Coraliomargarita	0	55	0
Alcanivorax	0	52	0
Roseibaca	0	50	0
Tropicimonas	94	45	0
Thiohalospira	0	45	0
Roseicyclus	0	43	0
Fusibacter	65	42	0
Defluviitaleaceae_UCG-011	44	40	0
Amaricoccus	0	40	0
Nitrosomonas	0	37	0
Sandaracinobacter	0	37	0
Aestuariivita	0	31	0
Nitrococcus	0	31	0
Polymorphobacter	0	31	0
Legionella	0	30	0
Thiohalorhabdus	0	30	0
Bdellovibrio	27	25	0
IMCC26207	0	24	0
Verruc-01	0	24	0
Salegentibacter	0	22	0
Geofilum	0	21	0
Halobacteriovorax	0	21	0
Candidatus_Alysiosphaera	69	20	0
Soehngenia	11	20	0
Algiphilus	0	20	0
SC103	0	20	0
Sporosalibacterium	0	20	0
Anaerophaga	0	19	0
MAT-CR-P4-C12	0	19	0
SM1A02	8	18	0
Saccharospirillum	0	18	0
Leptothrix	1083	14	0
RBG-16-49-21	147	6	0
Desulfuromonas	115	5	0
Dinghuibacter	69	5	0
Ruminococcaceae_UCG-012	19	4	0
Thiobacillus	1264	0	0
Ignavibacterium	696	0	0
Candidatus_Competibacter	407	0	0
Candidatus_Electronema	386	0	0
Ilumatobacter	361	0	0
Desulfobulbus	309	0	0
Geobacter	293	0	0
Treponema_2	273	0	0
Desulfococcus	261	0	0
Sva0081_sediment_group	244	0	0
Desulfomicrobium	213	0	0
Synechococcus_MBIC10613	208	0	0
Anaerolinea	198	0	0
Treponema	192	0	0
Annamia_HOs24	190	0	0
Mangroviflexus	177	0	0
Bryobacter	173	0	0
Ellin6067	167	0	0
Gemmatimonas	166	0	0
Sulfuritalea	159	0	0
Chthoniobacter	150	0	0
WCHB1-32	147	0	0
Nitrospira	146	0	0
Anaerovorax	139	0	0
Lentimicrobium	132	0	0
Sideroxydans	123	0	0
Ferritrophicum	115	0	0
Halioglobus	115	0	0
IS-44	115	0	0
Terrimonas	112	0	0
966-1	108	0	0
Desulfatirhabdium	108	0	0
Desulfobacter	102	0	0
Rhodobacter	101	0	0
Desulfosarcina	95	0	0
Blvii28_wastewater-sludge_group	93	0	0
Desulfocapsa	93	0	0
Sulfuricella	91	0	0
GWD2-49-16	90	0	0
Cyanobium_PCC-6307	78	0	0
Beggiatoa	69	0	0
Defluviimonas	69	0	0
Leptolinea	69	0	0
Propionivibrio	69	0	0
MND1	64	0	0
Pedomicrobium	63	0	0
Acidaminobacter	58	0	0
Sulfuriferula	58	0	0
Dongia	51	0	0
Anaerolineaceae_UCG-001	50	0	0
Magnetospirillum	49	0	0
Azohydromonas	48	0	0
Ruminiclostridium	46	0	0
Uliginosibacterium	44	0	0
OM60(NOR5)_clade	43	0	0
Alterococcus	42	0	0
Desulfoprunum	42	0	0
Cephaloticoccus	39	0	0
Novosphingobium	38	0	0
Ercella	37	0	0
Ferribacterium	36	0	0
Methylobacter	36	0	0
Lutibacter	35	0	0
Polaromonas	35	0	0
Clostridium_sensu_stricto_13	34	0	0
Caenimonas	33	0	0
Desulfofustis	33	0	0
Xenococcus_PCC-7305	33	0	0
Gallionella	32	0	0
Magnetovibrio	32	0	0
Ornatilinea	31	0	0
Sulfurovum	31	0	0
Thiogranum	30	0	0
Candidatus_Omnitrophus	28	0	0
Fodinicola	28	0	0
Salinispira	28	0	0
Erysipelothrix	27	0	0
Calothrix_PCC-6303	25	0	0
Lacibacter	24	0	0
Methylomonas	24	0	0
Sphingosinicella	24	0	0
Zeaxanthinibacter	24	0	0
Sulfurisoma	23	0	0
Denitratisoma	22	0	0
Galbibacter	21	0	0
Pelolinea	21	0	0
Pseudarthrobacter	21	0	0
Acholeplasma	20	0	0
Maribacter	20	0	0
MSBL3	19	0	0
Rivularia_PCC-7116	19	0	0
Ruminiclostridium_1	19	0	0
Thermoanaerobaculum	19	0	0
Prosthecobacter	18	0	0
Stenotrophobacter	18	0	0
