# Supplementary material for: Diversity, Taxonomic Novelty, and Encoded Functions of Salar de Ascotán Microbiota, as Revealed by Metagenome-Assembled Genomes
Source: Microorganisms. 2023 Nov 20;11(11):2819. doi: 10.3390/microorganisms11112819 (PMC10673233; doi:10.3390/microorganisms11112819)
Supplement: Supplementary file 1 [file microorganisms-11-02819-s001.zip › Table S3.xlsx]

## Sheet: Sheet1
Table S3. Main stats of the bacterial and archaeal MAGs recovered from Salar de Ascotán's soil, sediment, and water.
		CheckM								GTDB-Tk
MAG	Sample	Completeness	Contamination	GC content (%)	Lineage	N50 (bp)	Total lenght (bp)	quality (completeness - 5*contamination)	N° Contigs	Domain	Phylum	Class	Order	Family	Genus	Species	Sub Species
AWA19	Water	97.94	3.131	66.9	Actinomycetales	200783	6912006	82.285	129	Bacteria	Actinobacteriota	Actinomycetia	Mycobacteriales	Mycobacteriaceae	Mycobacterium	-	-
AWA22	Water	97.24	2.694	64.9	Actinomycetales	549423	5581113	83.77	18	Bacteria	Actinobacteriota	Actinomycetia	Mycobacteriales	Mycobacteriaceae	Rhodococcus	Rhodococcus	sp000813105
ASE20	Sediment	97.5	0	62.4	Alphaproteobacteria	1041183	3179795	97.5	5	Bacteria	Pseudomonadota	Alphaproteobacteria	Caulobacterales	Parvularculaceae	CV81	-	-
ASE11	Sediment	75.64	2.617	61	Bacteria	83842	4140183	62.555	60	Bacteria	Acidobacteriota	Acidobacteriae	Bryobacterales	Bryobacteraceae	JACTMJ01	-	-
ASE14	Sediment	64.28	0	61.6	Bacteria	120823	3240054	64.28	33	Bacteria	Desulfobacterota	Desulfobacteria	Desulfobacterales	JAABRJ01	JAABRJ01	JAABRJ01	sp011390985
ASE15	Sediment	65.81	1.098	67.3	Bacteria	119808	3216413	60.32	39	Bacteria	Gemmatimonadota	Gemmatimonadetes	Gemmatimonadales	Gemmatimonadaceae	JACMLX01	-	-
ASE4	Sediment	94.97	5.307	36	Bacteria	151703	3640683	68.435	51	Bacteria	Bacteroidota	Ignavibacteria	Ignavibacteriales	Ignavibacteriaceae	IGN2	-	-
ASE5	Sediment	85.71	7.142	57	Bacteria	148861	4468862	50	40	Bacteria	Desulfobacterota	Desulfobacteria	Desulfobacterales	SG8-13	-	-	-
ASE9	Sediment	83.77	4.032	49.4	Bacteria	119497	3418300	63.61	36	Bacteria	Bacteroidota	Bacteroidia	Bacteroidales	VadinHA17	SR-FBR-E99	-	-
ASO1	Soil	69.44	0.925	40.8	Bacteria	1308268	1330439	64.815	3	Bacteria	Patescibacteria	Paceibacteria	Moranbacterales	UBA2193	-	-	-
ASO18	Soil	73.98	0.546	47.1	Bacteria	207855	2893500	71.25	23	Bacteria	Bacteroidota	Rhodothermia	Balneolales	Balneolaceae	Fodinibius	-	-
ASO25	Soil	93.16	2.136	70.1	Bacteria	530607	3602790	82.48	14	Bacteria	Actinobacteriota	Acidimicrobiia	Acidimicrobiales	JACDCH01	-	-	-
ASO29	Soil	98.29	2.991	69.5	Bacteria	494280	3295530	83.335	10	Bacteria	Actinobacteriota	Acidimicrobiia	Acidimicrobiales	SKKL01	SKKL01	-	-
ASO30	Soil	74.75	0.99	49.6	Bacteria	1027808	1027808	69.8	1	Bacteria	Patescibacteria	ABY1	SG8-24	GWF2-40-263	-	-	-
ASO32	Soil	95.9	5.737	42.5	Bacteria	234214	3342716	67.215	21	Bacteria	Bacteroidota	Rhodothermia	Balneolales	Balneolaceae	Fodinibius	-	-
ASO35	Soil	84.88	1.694	71	Bacteria	1915109	2629020	76.41	13	Bacteria	Deinococcota	Deinococci	Deinococcales	Trueperaceae	SLSQ01	-	-
ASO36	Soil	90.59	4.569	43.6	Bacteria	159578	3166076	67.745	35	Bacteria	Bacteroidota	Bacteroidia	Bacteroidales	VadinHA17	-	-	-
ASO39	Soil	88.46	2.897	46.5	Bacteria	916083	4943594	73.975	10	Bacteria	Bacteroidota	Rhodothermia	Balneolales	Balneolaceae	-	-	-
ASO4	Soil	89.89	3.825	42	Bacteria	881182	2666515	70.765	7	Bacteria	Bacteroidota	Rhodothermia	Balneolales	Balneolaceae	YR4-1	-	-
ASO40	Soil	88.19	2.966	62.2	Bacteria	105611	3808465	73.36	53	Bacteria	Deinococcota	Deinococci	Deinococcales	Trueperaceae	-	-	-
ASO43	Soil	65.51	0	69	Bacteria	115124	3383834	65.51	43	Bacteria	Pseudomonadota	Alphaproteobacteria	Kiloniellales	Rhodovibrionaceae	Rhodovibrio	-	-
ASO45	Soil	96.99	4.735	43.2	Bacteria	1031423	4240428	73.315	10	Bacteria	Bacteroidota	Rhodothermia	Balneolales	Balneolaceae	Rhodohalobacter	-	-
ASO46	Soil	98.35	3.296	67.3	Bacteria	3103005	3489967	81.87	3	Bacteria	Gemmatimonadota	Gemmatimonadetes	Longimicrobiales	UBA6960	-	-	-
ASO47	Soil	65.89	0.925	45.4	Bacteria	706252	854954	61.265	4	Bacteria	Patescibacteria	Saccharimonadia	Saccharimonadales	SLHW01	-	-	-
ASO49	Soil	92.14	4.395	46.8	Bacteria	1173084	5258914	70.165	5	Bacteria	KSB1	UBA2214	UBA2214	Zgenome-0027	-	-	-
ASO5	Soil	93.98	2.459	42.1	Bacteria	592586	4565328	81.685	22	Bacteria	Bacteroidota	Rhodothermia	Balneolales	Balneolaceae	UBA2664	-	-
ASO50	Soil	50.86	0	71.1	Bacteria	139555	2793657	50.86	34	Bacteria	Actinobacteriota	Acidimicrobiia	Acidimicrobiales	-	-	-	-
ASO52	Soil	95.62	5.355	59.7	Bacteria	656156	3196504	68.845	18	Bacteria	Bacteroidota	Rhodothermia	Balneolales	Balneolaceae	-	-	-
ASO53	Soil	88.82	1.135	36.6	Bacteria	708857	3844963	83.145	29	Bacteria	Bacteroidota	Ignavibacteria	Ignavibacteriales	Melioribacteraceae	-	-	-
ASO55	Soil	94.62	1.344	44	Bacteria	4086901	4353372	87.9	3	Bacteria	Bacteroidota	Bacteroidia	Bacteroidales	GCA-2711565	-	-	-
ASO57	Soil	68.61	0.882	38.8	Bacteria	892938	892938	64.2	1	Bacteria	Patescibacteria	Microgenomatia	UBA1400	-	-	-	-
ASO60	Soil	68.04	0.99	67.1	Bacteria	135814	2736372	63.09	26	Bacteria	Chloroflexota	Dehalococcoidia	Tepidiformales	Tepidiformaceae	-	-	-
ASO63	Soil	58.86	0.985	43.8	Bacteria	175998	3541219	53.935	28	Bacteria	Bacteroidota	Bacteroidia	Bacteroidales	BM520	-	-	-
ASO65	Soil	79.03	2.15	55.3	Bacteria	154557	2694486	68.28	21	Bacteria	Planctomycetota	B143-G9	B143-G9	B143-G9	-	-	-
ASO67	Soil	92.05	1.098	45.9	Bacteria	504506	2362750	86.56	5	Bacteria	Marinisomatota	AB16	AB16	46-47	M50B103	-	-
ASO69	Soil	84.02	3.409	48.3	Bacteria	713232	3346500	66.975	9	Bacteria	Spirochaetota	Spirochaetia	DSM-16054	Sediminispirochaetaceae	DSBN01	-	-
ASO70	Soil	82.18	1.724	43.4	Bacteria	166484	685693	73.56	5	Bacteria	Patescibacteria	Paceibacteria	UBA9983	CSBR16-193	-	-	-
ASO73	Soil	90.88	5.296	70.8	Bacteria	895528	3465647	64.4	10	Bacteria	Deinococcota	Deinococci	Deinococcales	Trueperaceae	SLSQ01	-	-
ASO76	Soil	74.89	1.661	46.3	Bacteria	342805	3314158	66.585	15	Bacteria	Bacteroidota	Bacteroidia	Flavobacteriales	Schleiferiaceae	Owenweeksia	-	-
ASO77	Soil	85.18	3.134	48.9	Bacteria	145094	988447	69.51	11	Bacteria	Patescibacteria	Saccharimonadia	Saccharimonadales	SLHW01	-	-	-
ASO8	Soil	92.97	2.808	42.2	Bacteria	272022	3320743	78.93	26	Bacteria	Bacteroidota	Rhodothermia	Balneolales	Balneolaceae	Gracilimonas	-	-
ASO82	Soil	72.11	1.485	33.1	Bacteria	1247554	1247554	64.685	1	Bacteria	Patescibacteria	ABY1	CAIXNZ01	CAIXNZ01	WJKP01	-	-
ASO83	Soil	72.47	0	34	Bacteria	698002	1239160	72.47	3	Bacteria	Patescibacteria	ABY1	UM-FILTER-42-10	-	-	-	-
ASO84	Soil	65.3	1.818	52.9	Bacteria	477703	2341430	56.21	8	Bacteria	Chloroflexota	Anaerolineae	Anaerolineales	UBA11858	B10-G9	-	-
ASO9	Soil	83.01	2.575	41.3	Bacteria	209971	1981763	70.135	13	Bacteria	Actinobacteriota	Humimicrobiia	Humimicrobiales	Humimicrobiaceae	-	-	-
ASO91	Soil	98.9	0	43.9	Bacteria	1573511	2600818	98.9	2	Bacteria	Krumholzibacteriota	Krumholzibacteria	Krumholzibacteriales	WJIX01	-	-	-
ASO92	Soil	86.43	1.098	52.1	Bacteria	1631254	1958046	80.94	2	Bacteria	Marinisomatota	AB16	AB16	46-47	M50B103	M50B103	sp018400915
AWA13	Water	100	5.172	62.3	Bacteria	582468	8729218	74.14	122	Bacteria	Actinobacteriota	Actinomycetia	Mycobacteriales	Mycobacteriaceae	Rhodococcus	-	-
AWA14	Water	80.82	5.894	26.8	Bacteria	101297	2929392	51.35	69	Bacteria	Campylobacterota	Campylobacteria	Campylobacterales	Arcobacteraceae	Aliarcobacter	-	-
AWA20	Water	60.34	1.724	59.8	Bacteria	60982	3439526	51.72	98	Bacteria	Pseudomonadota	Alphaproteobacteria	Rhizobiales	Rhizobiaceae	Agrobacterium	-	-
AWA24	Water	59.48	0	46.3	Bacteria	47550	2951973	59.48	91	Bacteria	Pseudomonadota	Gammaproteobacteria	Enterobacterales	Alteromonadaceae	Pararheinheimera	Pararheinheimera	sp017302255
AWA10	Water	90.95	1.732	40.4	Bacteroidetes	222287	5328291	82.29	44	Bacteria	Bacteroidota	Bacteroidia	Chitinophagales	Saprospiraceae	JAAFJT01	-	-
ASE18	Sediment	91.12	1.635	69.3	Burkholderiales	137863	4196282	82.945	39	Bacteria	Pseudomonadota	Gammaproteobacteria	Burkholderiales	Burkholderiaceae	Rubrivivax	-	-
AWA1	Water	61.25	0.732	62.9	Burkholderiales	39178	3122013	57.59	128	Bacteria	Pseudomonadota	Gammaproteobacteria	Burkholderiales	Burkholderiaceae	Ideonella	-	-
AWA17	Water	99.84	0	59.5	Burkholderiales	1885725	3605843	99.84	2	Bacteria	Pseudomonadota	Gammaproteobacteria	Burkholderiales	Burkholderiaceae	Rhodoferax	-	-
AWA2	Water	99.62	4.356	67.2	Burkholderiales	442491	7015948	77.84	32	Bacteria	Pseudomonadota	Gammaproteobacteria	Burkholderiales	Burkholderiaceae	Acidovorax	-	-
AWA25	Water	96.33	0	67.9	Burkholderiales	1567941	5029664	96.33	7	Bacteria	Pseudomonadota	Gammaproteobacteria	Burkholderiales	Burkholderiaceae	Sphaerotilus	-	-
AWA33	Water	95.12	2.336	61.1	Burkholderiales	164391	4328681	83.44	45	Bacteria	Pseudomonadota	Gammaproteobacteria	Burkholderiales	Burkholderiaceae	Rhodoferax	-	-
AWA8	Water	65.61	2.336	60.4	Burkholderiales	56961	2876721	53.93	84	Bacteria	Pseudomonadota	Gammaproteobacteria	Burkholderiales	Burkholderiaceae	Rhodoferax	-	-
ASE13	Sediment	91.22	1.438	44	Cytophagales	208476	5068567	84.03	39	Bacteria	Bacteroidota	Bacteroidia	Cytophagales	Cyclobacteriaceae	JAAUQL01	-	-
ASE8	Sediment	66.28	1.19	41.1	Cytophagales	152952	4268810	60.33	38	Bacteria	Bacteroidota	Bacteroidia	Cytophagales	Cyclobacteriaceae	ELB16-189	-	-
AWA27	Water	65.77	1.488	37.4	Cytophagales	49565	3644185	58.33	135	Bacteria	Bacteroidota	Bacteroidia	Cytophagales	Spirosomaceae	Emticicia	-	-
AWA30	Water	84.39	1.074	38	Cytophagales	141261	5004856	79.02	68	Bacteria	Bacteroidota	Bacteroidia	Cytophagales	Spirosomaceae	Arcicella	-	-
ASO12	Soil	89.81	0	60.3	Deltaproteobacteria	298521	2383034	89.81	16	Bacteria	Desulfobacterota	Desulfobulbia	Desulfobulbales	Desulfurivibrionaceae	Desulfurivibrio	-	-
ASO14	Soil	98.7	2.258	52.9	Deltaproteobacteria	417693	4115347	87.41	21	Bacteria	Desulfobacterota	Desulfobacteria	Desulfobacterales	Desulfobacteraceae	Desulfotignum	-	-
ASO27	Soil	96.42	3.548	52.7	Deltaproteobacteria	5226939	5244988	78.68	2	Bacteria	Desulfobacterota	DSM-4660	Desulfatiglandales	Desulfatiglandaceae	-	-	-
ASO54	Soil	87.16	1.19	51.6	Deltaproteobacteria	256482	4394467	81.21	22	Bacteria	Desulfobacterota	Desulfovibrionia	Desulfovibrionales	Desulfohalobiaceae	Desulfovermiculus	-	-
ASO89	Soil	99.35	1.935	52	Deltaproteobacteria	1038823	4328727	89.675	8	Bacteria	Desulfobacterota	Desulfobacteria	Desulfobacterales	SURF-3	M55B175	-	-
ASO16	Soil	94.09	0	58.7	Euryarchaeota	495005	2282809	94.09	6	Archaea	Halobacteriota	Halobacteria	JAHENH01	-	-	-	-
ASO22	Soil	98.4	0.8	43.7	Euryarchaeota	2494642	2494642	94.4	1	Archaea	Thermoplasmatota	Thermoplasmata	PWKY01	PWKY01	-	-	-
ASO31	Soil	93.71	1.535	30.2	Firmicutes	553549	2129283	86.035	6	Bacteria	Bacillota	Halanaerobiia	Halanaerobiales	M55B127	M55B127	-	-
ASE10	Sediment	82.58	2.516	39.5	Flavobacteriaceae	209659	2992819	70	25	Bacteria	Bacteroidota	Bacteroidia	Flavobacteriales	Flavobacteriaceae	QNYL01	-	-
ASE17	Sediment	54.45	0.766	62.6	Gammaproteobacteria	76744	2185900	50.62	39	Bacteria	Pseudomonadota	Gammaproteobacteria	Competibacterales	Competibacteraceae	REEE01	-	-
ASO11	Soil	73.63	1.32	64.9	Gammaproteobacteria	269602	3122646	67.03	14	Bacteria	Pseudomonadota	Gammaproteobacteria	Woeseiales	Woeseiaceae	-	-	-
ASO15	Soil	62.15	2.336	59.8	Gammaproteobacteria	363468	3152549	50.47	16	Bacteria	Pseudomonadota	Gammaproteobacteria	Pseudomonadales	HTCC2089	UBA7451	-	-
ASO19	Soil	98.46	1.957	56.9	Gammaproteobacteria	2490524	3055478	88.675	3	Bacteria	Pseudomonadota	Gammaproteobacteria	UBA6429	UBA6429	Thiohalophilus	-	-
ASO2	Soil	74.07	1.851	64.8	Gammaproteobacteria	158999	3594534	64.815	36	Bacteria	Pseudomonadota	Gammaproteobacteria	Pseudomonadales	HTCC2089	UBA7803	-	-
ASO24	Soil	100	0	63.9	Gammaproteobacteria	2499224	2499224	100	1	Bacteria	Pseudomonadota	Gammaproteobacteria	Halothiobacillales	Halothiobacillaceae	Guyparkeria	-	-
ASO3	Soil	97.11	1.649	65.2	Gammaproteobacteria	3719357	5139057	88.865	7	Bacteria	Pseudomonadota	Gammaproteobacteria	JAABTG01	JAABTG01	JAABTG01	-	-
ASO37	Soil	89.23	0.714	57.4	Gammaproteobacteria	458666	2845471	85.66	13	Bacteria	Pseudomonadota	Gammaproteobacteria	UBA4486	-	-	-	-
ASO59	Soil	64.47	1.349	71.7	Gammaproteobacteria	211415	2945698	57.725	23	Bacteria	Pseudomonadota	Gammaproteobacteria	XJ16	Halofilaceae	Halofilum	-	-
ASO6	Soil	78.57	1.809	60.8	Gammaproteobacteria	179958	3600141	69.525	33	Bacteria	Pseudomonadota	Gammaproteobacteria	Woeseiales	Woeseiaceae	-	-	-
ASO61	Soil	95.64	0.434	62.6	Gammaproteobacteria	1652686	4401026	93.47	7	Bacteria	Pseudomonadota	Gammaproteobacteria	Pseudomonadales	Halieaceae	Halioglobus	-	-
ASO64	Soil	94.02	1.294	57.1	Gammaproteobacteria	363945	3245172	87.55	16	Bacteria	Pseudomonadota	Gammaproteobacteria	UBA6429	UBA6429	Thiohalophilus	-	-
ASO71	Soil	63.15	1.701	67.2	Gammaproteobacteria	440683	2443509	54.645	21	Bacteria	Pseudomonadota	Gammaproteobacteria	XJ16	Halofilaceae	Halofilum	-	-
ASO75	Soil	85.23	1.525	66.8	Gammaproteobacteria	148630	2515911	77.605	20	Bacteria	Pseudomonadota	Gammaproteobacteria	XJ16	Halofilaceae	Halofilum	-	-
ASO79	Soil	91.24	7.789	63.9	Gammaproteobacteria	382473	3622309	52.295	23	Bacteria	Pseudomonadota	Gammaproteobacteria	Xanthomonadales	Wenzhouxiangellaceae	Wenzhouxiangella	-	-
ASO80	Soil	95.55	4.657	63.6	Gammaproteobacteria	388724	4474239	72.265	15	Bacteria	Pseudomonadota	Gammaproteobacteria	Arenicellales	JAANXG01	JAANXG01	-	-
ASO86	Soil	53.69	0.528	68	Gammaproteobacteria	213826	2527288	51.05	20	Bacteria	Pseudomonadota	Gammaproteobacteria	Nitrococcales	Nitrococcaceae	Arhodomonas	-	-
ASO87	Soil	99.78	3.34	63.6	Gammaproteobacteria	722235	3857121	83.08	20	Bacteria	Pseudomonadota	Gammaproteobacteria	Pseudomonadales	Halomonadaceae	Halomonas	-	-
ASO88	Soil	68.88	2.604	69.1	Gammaproteobacteria	255526	3603583	55.86	23	Bacteria	Pseudomonadota	Gammaproteobacteria	Pseudomonadales	HTCC2089	-	-	-
AWA15	Water	87.49	1.87	52.2	Gammaproteobacteria	161305	4423249	78.14	56	Bacteria	Pseudomonadota	Gammaproteobacteria	Enterobacterales	Alteromonadaceae	Pararheinheimera	-	-
AWA26	Water	94.62	3.085	47.4	Gammaproteobacteria	52666	3525406	79.195	113	Bacteria	Pseudomonadota	Gammaproteobacteria	Pseudomonadales	Cellvibrionaceae	Marinagarivorans	-	-
ASO38	Soil	92.9	1.702	63.1	Halobacteriaceae	465384	2355346	84.39	14	Archaea	Halobacteriota	Halobacteria	Halobacteriales	Haloarculaceae	CBA1134	-	-
ASO44	Soil	82.38	2.127	70.7	Halobacteriaceae	270202	2262979	71.745	29	Archaea	Halobacteriota	Halobacteria	Halobacteriales	-	-	-	-
ASO48	Soil	65.34	0.2	61.7	Halobacteriaceae	545704	2239027	64.34	7	Archaea	Halobacteriota	Halobacteria	Halobacteriales	Natrialbaceae	-	-	-
ASO85	Soil	80.1	0.638	62.5	Halobacteriaceae	1716174	1861655	76.91	2	Archaea	Halobacteriota	Halobacteria	Halobacteriales	Halobacteriaceae	Halodesulfurarchaeum	-	-
ASO78	Soil	85.4	6.534	45.5	Lactobacillales	185803	2214922	52.73	28	Bacteria	Bacillota	Bacilli	Lactobacillales	Carnobacteriaceae	Alkalibacterium	-	-
ASE7	Sediment	71.29	1.851	68.6	Proteobacteria	117938	3542307	62.035	42	Bacteria	Pseudomonadota	Gammaproteobacteria	Burkholderiales	Burkholderiaceae	DSNY01	-	-
AWA6	Water	70.27	2.755	61.7	Pseudomonadales	146129	2777276	56.495	34	Bacteria	Pseudomonadota	Gammaproteobacteria	Pseudomonadales	Pseudomonadaceae	Pseudomonas	-	-
AWA16	Water	67.17	0.258	50.8	Rhizobiales	55802	2182591	65.88	65	Bacteria	Pseudomonadota	Alphaproteobacteria	Rhizobiales	Rhizobiaceae	Ahrensia	-	-
AWA9	Water	90.4	6.427	61.9	Rhizobiales	212001	4914061	58.265	78	Bacteria	Pseudomonadota	Alphaproteobacteria	Rhizobiales	Rhizobiaceae	Allorhizobium	Allorhizobium	sp001713475
ASO34	Soil	90.84	4.521	66.6	Rhodobacteraceae	271177	3341801	68.235	25	Bacteria	Pseudomonadota	Alphaproteobacteria	Rhodobacterales	Rhodobacteraceae	Roseovarius	-	-
AWA3	Water	84.14	1.8	64.7	Rhodobacteraceae	114953	3817543	75.14	67	Bacteria	Pseudomonadota	Alphaproteobacteria	Rhodobacterales	Rhodobacteraceae	Gemmobacter	-	-
AWA7	Water	75.94	2.474	59.2	Rhodobacteraceae	54551	2567403	63.57	72	Bacteria	Pseudomonadota	Alphaproteobacteria	Rhodobacterales	Rhodobacteraceae	Cypionkella	-	-
ASE2	Sediment	58.66	0.511	58.2	Sphingomonadales	70949	1502454	56.105	28	Bacteria	Pseudomonadota	Alphaproteobacteria	Sphingomonadales	Sphingomonadaceae	Parasphingorhabdus	-	-
AWA28	Water	73.99	2.502	63.7	Sphingomonadales	98186	3210190	61.48	50	Bacteria	Pseudomonadota	Alphaproteobacteria	Sphingomonadales	Sphingomonadaceae	Sphingobium	-	-
